# Supplementary material
Source: Springer Nature journal article supplement (https://www.springermedizin.de/resource/supplementary/13075_2012_3795_MOESM3_ESM.pdf/9695368)

**A****RA****HC****IL-29**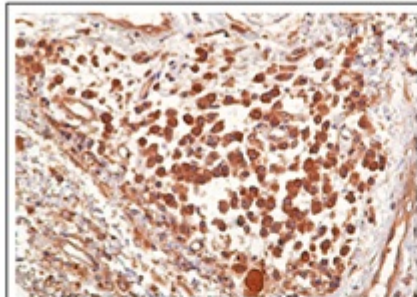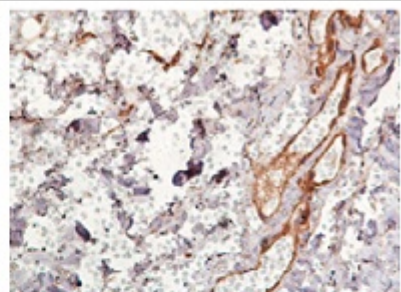**Isotype**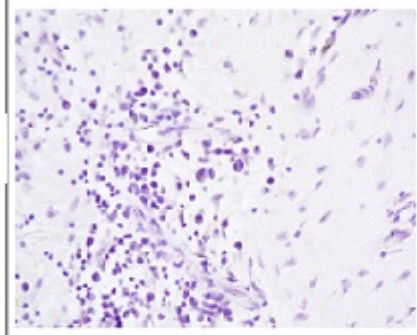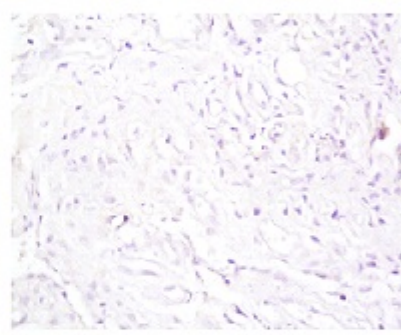**B**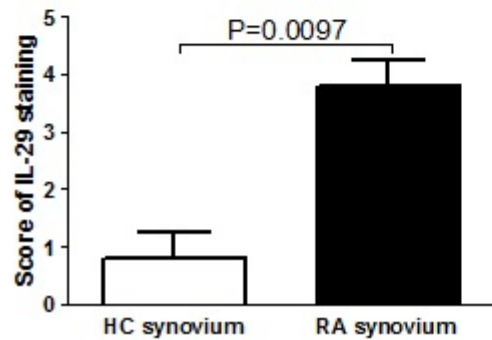

Supplement: MOESM3 [file 9695368]
